# Supplementary material for: C:N:P stoichiometry and nutrient limitation of the soil microbial biomass in a grazed grassland site under experimental P limitation or excess
Source: Springer Nature journal article supplement (doi:10.1186/2192-1709-1-6), 2012-06-21

**a) Basal Respiration**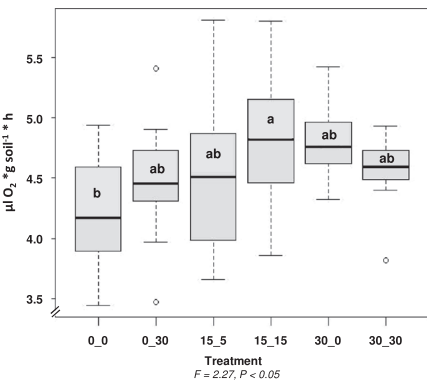**b) Respiratory Quotient**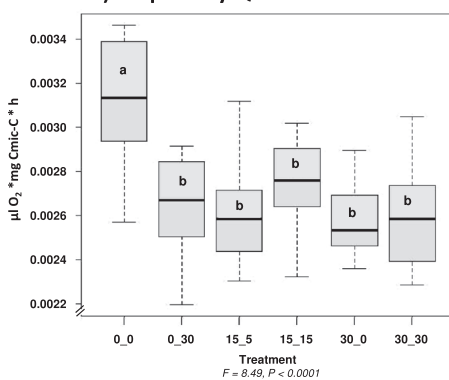**c) Microbial C-limitation**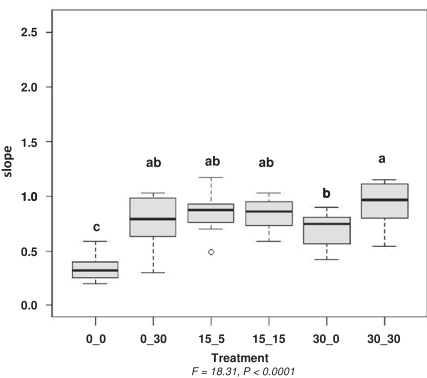**d) Microbial CN-limitation**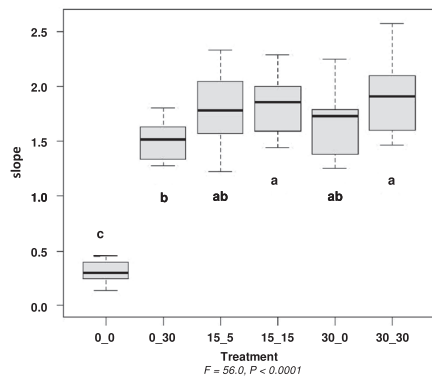**e) Microbial CP-limitation**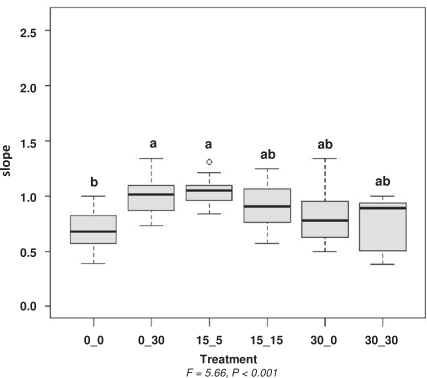**f) Microbial CNP-limitation**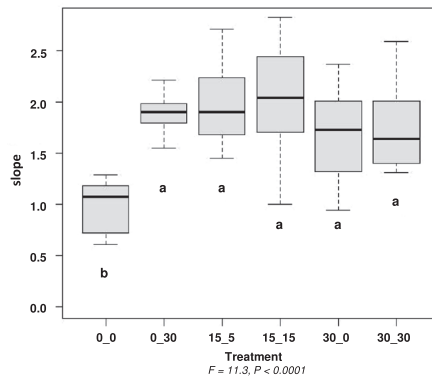

Supplement: 13717_2012_7_MOESM2_ESM.pdf [file 13717_2012_7_MOESM2_ESM.pdf]
