# Supplementary material for: C:N:P stoichiometry and nutrient limitation of the soil microbial biomass in a grazed grassland site under experimental P limitation or excess
Source: Springer Nature journal article supplement (doi:10.1186/2192-1709-1-6), 2012-06-21
Supplement: 13717_2012_7_MOESM4_ESM.pdf [file 13717_2012_7_MOESM4_ESM.pdf]

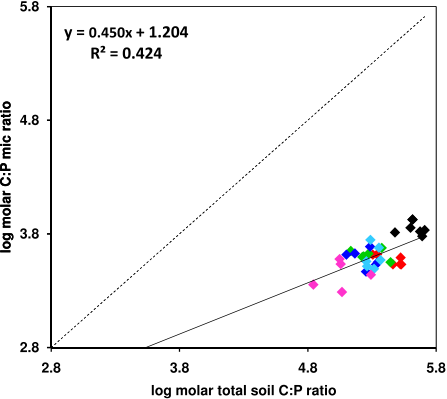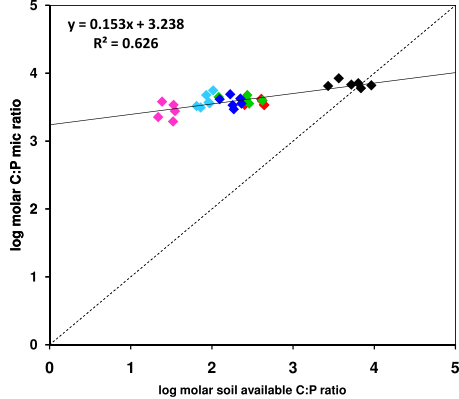

◆ 0\_0    ◆ 0\_30    ◆ 15\_5    ◆ 15\_15    ◆ 30\_0    ◆ 30\_30
